# Supplementary material for: Proteomic Approach for Comparative Analysis of the Spike Protein of SARS-CoV-2 Omicron (B.1.1.529) Variant and Other Pango Lineages
Source: MDPI journal article supplement (doi:10.3390/proteomes10040034), 2022-10-14
Supplement: s1 [file s1]

## Supplementary Material:

**Table S1.** The amino acid substitution in omicron compared to  $\alpha$ ,  $\beta$ ,  $\delta$  &  $\gamma$  variants.

|                                                                                    | $\alpha$ Variant                                                                                                                                                                                                                                                                                                                                                                                                                                                                                                                                                                                                                                                                                                                                                                                                                                                                                                                                                                                                                                                                                                                                                                                                                                                                                                                                                                                                                                                                                                                                                     | $\beta$ Variant                                                                                                                                                                                               | $\delta$ Variant                                                                                                                                                                                                                                                                                | $\gamma$ Variant                                                                                                                                                                  |
|------------------------------------------------------------------------------------|----------------------------------------------------------------------------------------------------------------------------------------------------------------------------------------------------------------------------------------------------------------------------------------------------------------------------------------------------------------------------------------------------------------------------------------------------------------------------------------------------------------------------------------------------------------------------------------------------------------------------------------------------------------------------------------------------------------------------------------------------------------------------------------------------------------------------------------------------------------------------------------------------------------------------------------------------------------------------------------------------------------------------------------------------------------------------------------------------------------------------------------------------------------------------------------------------------------------------------------------------------------------------------------------------------------------------------------------------------------------------------------------------------------------------------------------------------------------------------------------------------------------------------------------------------------------|---------------------------------------------------------------------------------------------------------------------------------------------------------------------------------------------------------------|-------------------------------------------------------------------------------------------------------------------------------------------------------------------------------------------------------------------------------------------------------------------------------------------------|-----------------------------------------------------------------------------------------------------------------------------------------------------------------------------------|
| Compared to<br>Omicron<br>variant changes<br>occurred in<br>Amino Acid<br>residues | S583-A710; T590-I717; V594-T721; Q598-P725;<br>S601-M728; P603-K730; I604-T731; V605-S732;<br>T610-M737; N614-G741; G615-D742; V617-T744;<br>V620-S747; K624-L751; T627-G754; N639-G766;<br>S640-I767; L643-E770; A646-K773; V648-T775;<br>T653-A780; F654-Q781; D655-V782; L661-T788;<br>N663-P790; S666-Y793; D669-G796; A687-S810;<br>G688-K811; V701-T824; T702-L825; S703-A826;<br>G704-D827; T707-F830; K713-G835; T716-L838;<br>K717-G839; G718-D840; S720-A842; A722-R844;<br>Y729-K851; M734-T856; A742-D864; R744-M866;<br>M747-Q869; G750-S872; S751-A873; I756-T878;<br>L758-T880; G759-S881; S763-F885; S766-G888;<br>S770-P896; A772-Q898; Q774-A900; S775-Y901;<br>Q788-Y914; A796-N922; T803-G929; V806-Q932;<br>A808-S934; V826-T938; N851-G943; S843-A955;<br>T848-V960; Q856-G968; S961-V973; A864-D976;<br>Q876-V988; A887-Q999; A888-S1000; V891-<br>T1003; T898-I1010; T901-A1013; R907-A1019;<br>Q911-A1023; K919-L1031; S920-G1032; G926-<br>D1038; T932-Y1044; A940-S1052; T950-V1062;<br>V951-T1063; T955-A1067; Y957-E1069; A962-<br>T1074; S964-P1076; V968-H1080; N972-A1084;<br>G973-H1085; L976-R1088; Q978-G1090; Y989-<br>H1098; R991-F1100; I996-N1105; I1005-T1114;<br>A1006-D1115; F1008-T1117; Q1010-V1119; I1011-<br>S1120; E1012-G1121; T1017-V1126; N1020-I1129;<br>E1025-V1134; T1028-P1137; V1030-Q1139; I1034-<br>D1143; S1044-F1153; Y1045-K1154; L1047-H1156;<br>P1048-T1157; P1053-D1162; D1054-L1163;<br>V1056-D1165; Q1059-G1168; Q1062-A1171;<br>K1077-V1186; S1078-A1187; A1079-K1188;<br>Y1083-E1192; Q1086-I1195 | G142-D140; N211-<br>I206; G217-D212; I243-<br>246R; G336D; S368L;<br>S370P; S372F; G443S;<br>K481A; G493S; Y502H;<br>H652Y; P678H; D793Y;<br>E1235G; L1237S;<br>K1244L; D1245F;<br>D1247G; D1248P;<br>K1249G, | T95I; G142-D140;<br>G339-D336; S371-<br>L368; S373-P370;<br>S375-F372; G446-<br>S443; R452-L449;<br>E484-A481; G496-<br>S493; N501-Y498;<br>Y505-H502; H655-<br>Y652; D796-Y793;<br>E1238-G1235;<br>L1240-S1237;<br>K1247-L1241;<br>D1248-F1242;<br>D1250-G1244;<br>D1251-P1245;<br>K1252-G1246 | G142-D140;<br>N211-I206; G339-<br>D336; S371-L368;<br>S373-P370; S375-<br>F372; G446-S443;<br>E484-A481;<br>G496-S493;<br>N501-Y498;<br>Y505-H502;<br>H655-Y652;<br>A682S; D793Y; |

## Parameters which used in different server:

### For SuperPose version 1.0:

#### Alignment Options:

PDB Entry A: Restrict superposition to residues: **All**

PDB Entry B: Restrict superposition to residues: **All**

#### Secondary Structure Alignment:

Guide the superposition with a secondary structure alignment rather than a sequence alignment when pairwise sequence identities fall below: **25%**

#### Subdomain Matching:

SuperPose can look for structurally similar and dissimilar regions between aligned protein chains. This is useful in identifying hinge motions, mobile segments, etc. If SuperPose finds structurally dissimilar regions, it will superpose the structures based on the single longest structurally similar region shared by the sequences.

Subdomain matching: On

Minimum Sequence Similarity:

Look for subdomain matches and mismatches (e.g. hinge regions) for sequences with pairwise sequence identities above: **80%**

Similarity Cutoff:

Identify as 'similar' aligned alpha-carbon atoms with RMSDs less than **2 Angstroms**.

Dissimilarity Cutoff:

Identify as 'dissimilar' aligned alpha-carbon atoms with RMSDs greater than **3.0 Angstroms**

Dissimilar Subdomain:

The minimum number of contiguous alpha-carbon atoms with RMSDs above the Dissimilarity Cutoff (above) required to be considered a 'dissimilar' subdomain is **7 atoms**.

**Table S2.** Parameter for HADDOCK 2.4.

| <b>Parameters</b>                                                   | <b>Easy interface</b> |
|---------------------------------------------------------------------|-----------------------|
| Active and passive residue lists                                    | Supported             |
| Docking from ensemble structures                                    | Supported             |
| Protein–nucleic acid docking                                        | Supported             |
| Cofactors and modified amino acids                                  | Supported             |
| Semi-flexible segment definition                                    | Automatic             |
| Fully flexible segment definition                                   | No                    |
| Histidine protonation states                                        | Automatic             |
| Custom CNS distance restraints                                      | No                    |
| Custom hydrogen bond restraints                                     | No                    |
| Custom dihedral angle restraints                                    | No                    |
| Preservation of nucleic acid base pairing and backbone conformation | Automatic             |
| Ab initio docking                                                   | No                    |
| Nonpolar hydrogens                                                  | No                    |
| Random removal of restraints                                        | Automatic             |
| Number of structures to dock and to refine                          | Automatic             |
| DMSO refinement                                                     | No                    |
| Solvated docking                                                    | No                    |
| Epsilon (electrostatic scaling constant)                            | Automatic             |
| Clustering                                                          | Automatic             |
| Symmetry                                                            | No                    |
| Restraints energy constants                                         | Automatic             |
| Relaxation anisotropy restraints                                    | No                    |
| Residual dipolar couplings                                          | No                    |
| Energy and interaction parameter                                    | Automatic             |
| Scoring parameters                                                  | Automatic             |
| Randomization of starting orientations                              | Automatic             |
| Refinement-only protocol                                            | No                    |
| Temperature and time steps of the various refinement stages         | Automatic             |

#### **For PRODIGY:**

**Temperature (in °C):** By default the value of the dissociation constant ( $K_d$ ) is calculated at 25 °C. The user can change this value to any desired temperature.
